# Supplementary material for: Cation-induced changes in the inner- and outer-sphere mechanisms of electrocatalytic CO2 reduction
Source: PubMed Central journal article supplement (PMC10665450; doi:10.1038/s41467-023-43300-4), 2023-11-22
Supplement: 41467_2023_43300_MOESM1_ESM.pdf [file 41467_2023_43300_MOESM1_ESM.pdf]

# Supporting Information for

## Cation-induced changes in the inner- and outer-sphere mechanisms of electrocatalytic CO<sub>2</sub> reduction

Xueping Qin<sup>1\*</sup>, Heine A. Hansen<sup>1</sup>, Karoliina Honkala<sup>2</sup>  
and Marko M. Melander<sup>2\*</sup>

<sup>1</sup>Department of Energy Conversion and Storage, Technical  
University of Denmark, Anker Engelunds Vej Building 301, Kgs.  
Lyngby, 2800, Denmark.

<sup>2</sup>Department of Chemistry, Nanoscience Center, University of  
Jyväskylä, P.O. Box 35, FI-40014, Jyväskylä, Finland.

\*Corresponding author(s). E-mail(s): xueqi@dtu.dk;  
marko.m.melander@jyu.fi;

## S.1 OS-ET analysis

### S.1.1. Au-water-2Li

For the Au-water-2Li interface, the cDFT-MD simulations are performed. The energy gap distributions are sampled and key structures of diabatic states of OS-ET at Au-water-2Li interfaces are shown in Fig. S1. With the presence of Li cations, the reorganization energy is calculated to be 7.60 eV with a reaction energy of 3.63 eV. The Marcus energy barrier (4.15 eV) is even higher than the Au-water-2K system (2.93 eV). Such a difference can be ascribed to the different solvation properties of Li and K: Li is strongly hydrated compared to K and has a higher solvation energy.[1] This indicates that the interactions between Li cations and surrounding water molecules are stronger than K-H<sub>2</sub>O, leading to a higher reorganization energy and thus a high Marcus barrier.

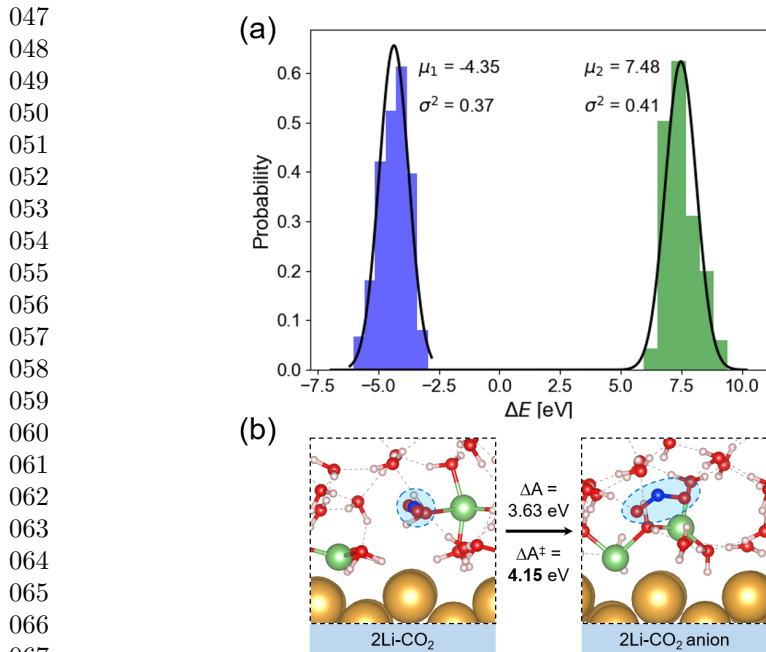

068 **Fig. S1:** The energy gap distributions (a) and key structures of diabatic states  
069 (b) of OS-ET at Au-water-2Li interfaces.

070  
071  
072  
073

### S.1.2. Constant electrode potential corrections and Fermi levels for interfacial models

074 We have estimated the impact of constant potential corrections within the  
075 capacitor model.[2] The resulting energy corrections are quite small as shown in  
076 Table S1. For the 2K system, the Fermi level difference between the initial (2K-  
077 CO<sub>2</sub>) and final states (2K-CO<sub>2</sub> anion) is only 0.28 eV; even if we consider the  
078 maximum charge difference of 1e, the energy correction within the capacitor  
079 model is only 0.14 eV. For the water system, the Fermi level difference is even  
080 smaller (0.08 eV) with a negligible energy correction of 0.04 eV. Comparing  
081 the water-CO<sub>2</sub> and 2K-CO<sub>2</sub>, the Fermi level difference is also very small, 0.28  
082 eV; water-CO<sub>2</sub> anion and 2K-CO<sub>2</sub> anion show the Fermi level difference of  
083 0.08 eV.

084 Adding cations to the solution with neutral CO<sub>2</sub> should make the surface  
085 more negative, which is observed. In the water case, the Fermi level is changed  
086 only by 0.08 with a variance of 0.25 comparing the water-CO<sub>2</sub> and water-CO<sub>2</sub>  
087 anion systems, meaning that it is basically the same. It is also possible that the  
088 Fermi level of the water-CO<sub>2</sub> system is determined by CO<sub>2</sub><sup>-</sup> rather than the  
089 surface, which defines the Fermi level in the water-CO<sub>2</sub> system. The analysis of  
090 the density of states (DOS) and projected density of states (PDOS) supports  
091 this assertion as there is a clear overlap between CO<sub>2</sub><sup>-</sup> PDOS and total DOS in  
092

**Table S1:** Fermi levels of OS-ET structures.

| OS-ET             | 2K-CO <sub>2</sub> | 2K-CO <sub>2</sub> anion | Water-CO <sub>2</sub> | Water-CO <sub>2</sub> anion |
|-------------------|--------------------|--------------------------|-----------------------|-----------------------------|
| Fermi levels (eV) | -4.15±0.19         | -4.43±0.22               | -4.43±0.19            | -4.35±0.25                  |

water-CO<sub>2</sub><sup>-</sup> system, which is not observed for the water-CO<sub>2</sub> system (Fig. S13 and S14). These observations support the recent arguments[3] that the Fermi level is not the correct quantity for determining the electrode potential in outer-sphere reactions and that the electrode inner potential should instead be used to characterize the electrode potential.

### S.1.3. Clarifications on Marcus theory, energy gap, and reaction free energy

Marcus theory can be derived in several but equally valid ways. The linear response approximation is the central assumption behind the famous Marcus barrier equation.

$$\Delta A_{Marcus}^{\ddagger} = \frac{(\Delta A + \lambda)^2}{4\lambda} \quad (\text{S1})$$

$\Delta A_{Marcus}^{\ddagger}$  arises only when the diabatic energy curves are harmonic along the energy gap coordinate: this condition is met when the energy gap distributions are Gaussian, which is equivalent to the linear response approximation as well as the second cumulant expansion.[4, 5] In these cases, the iconic Marcus barrier can be obtained by simulating the initial and final states only. However, in the non-linear Marcus theory, thermodynamic integration at multiple points along the reaction coordinate (energy gap) is required.[6] Studying the non-linear effects would be very interesting, but here we restrict to the linear response theory.

In this work, we follow the cumulant expansion route based on Zwanzig’s linear response theory[4, 5], but, as stressed above, this is formally equal to the Gaussian energy gap or harmonic diabatic energy approximations. Within this linear response approximation and cumulant expansion, the reorganization energy can be computed exactly[4, 5] from the energy gap variance: this is equation 4a in Methods. Similarly, equation 4b in Methods arises from cumulant expansion and hence the linear response theory[4, 5], and the reaction free energy is given in terms of the energy gap expectation value and variance through the reorganization energy. Hence, both the reaction energy and reorganization energy depend on the energy gap distributions.

### S.1.4. Constrained DFT, electron transfer, and Marcus theory

Constrained DFT (cDFT)[7] is a method for building charge/spin localized or diabatic states with a user-defined charge and/or spin state, being a useful tool for widening the scope of ground-state DFT to excitation processes,

139 correcting for self-interaction energy in current DFT functionals, excitation  
 140 energy, and electron transfer (ET) as well as parametrizing model Hamiltoni-  
 141 ans, for example. cDFT works by specifying an additional constraining term to  
 142 the KS functional, and the role of this constraint is to enforce a user-specified  
 143 charge/spin state on the chosen regions of atoms.

144 For ET during  $\text{CO}_2$ -to- $\text{CO}_2^-$ , two diabatic or charge-localized states are  
 145 generated using constrained DFT as implemented in the GPAW code.[8] The  
 146  $\text{CO}_2$  and  $\text{CO}_2^-$  diabatic states are constructed by forcing the  $\text{CO}_2$  molecule to  
 147 carry either zero or -1 charge, respectively.

148 Marcus theory has served as the standard theoretical framework for ET  
 149 reactions for a considerable time. Marcus theory assumes weak coupling  
 150 between the electronic states of the reactants and products, and assumes a  
 151 linear response approximation, implying that the surrounding environment of  
 152 the molecules undergoing ET responds linearly to the event. In this approx-  
 153 imation, the free energy profiles of the two ET states can be represented as  
 154 intersecting parabolas. Two key parameters define the reactant and product  
 155 free energy curves: the driving force ( $\Delta A$ ), which represents the energy differ-  
 156 ence between the reactant and product states, and the reorganization energy  
 157 ( $\lambda$ ), which quantifies the energy cost associated with rearranging the reactant  
 158 or product to reach equilibrium. The Marcus expression for the ET rate is  
 159 derived from these free energy profiles using classical transition-state theory.

160

## 161 S.2 Enhanced sampling

162

163 DFT molecular dynamics (DFT-MD) simulations with slow-growth (SG) sam-  
 164 pling approach[9, 10] as implemented in VASP, are performed to evaluate the  
 165 kinetic barriers of IS-ET for the  $\text{CO}_2$ -to- $\text{CO}_2^{\delta-}$  (ads) reaction. In SG-DFT-MD,  
 166 a suitable collective variable (namely  $\xi$ ) is chosen as the reaction coordinate  
 167 and is linearly changed from the characteristic value of the initial state to the  
 168 final state with a transformation velocity  $\dot{\xi}$ . The work required to perform the  
 169 transformation from the initial to the final state can be computed as:

170

$$171 \quad W_{\text{initial-to-final}} = \int_{\xi(\text{initial})}^{\xi(\text{final})} \left( \frac{\partial F}{\partial \xi} \right) \cdot \dot{\xi} dt \quad (\text{S2})$$

172

173 where  $F$  is the time-dependent free energy and  $\frac{\partial F}{\partial \xi}$  can be computed using  
 174 SG-DFT-MD through the blue-moon ensemble sampling with the SHAKE  
 175 algorithm.[11] At the limit of infinitesimally small  $\partial \xi$ , the needed work  
 176 ( $W_{\text{initial-to-final}}$ ) corresponds to the adiabatic free energy difference between  
 177 the final and initial states. In the SG sampling,  $\partial \xi = 0.001 \text{ \AA}$  was adopted and  
 178 applied at each SG-DFT-MD step after testing the shorter step size for the  
 179 “slow-growth”.

180

181 The reaction barriers and reaction energies can be obtained by computing  
 182 the free energy profiles after thermodynamic integration,[11, 12] which was  
 183 carried out using in-house codes/scripts to post-process the output data to  
 184 smoothen the data by using a running mean.

### S.3 Charge transfer analysis for IS-ET at Au-water interfaces

Bader charge analysis[13, 14] is applied to evaluate the electron transfer between different parts of the system. The analysis results during SG-DFT-MD simulations for IS-ET at Au-water interfaces without any cations, are shown in Fig. S2, indicating that CO<sub>2</sub> would be partially reduced by receiving 0.31 e from Au and water solvents if the inner-sphere reduction could occur.

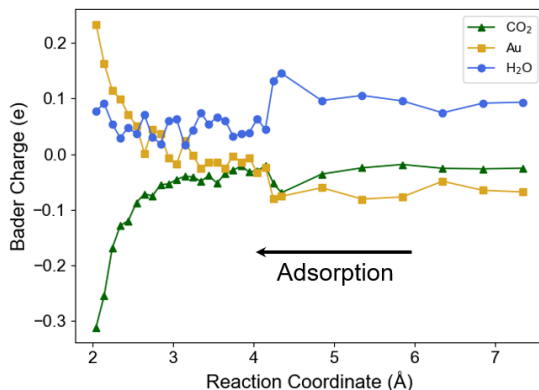

**Fig. S2:** Bader charge analysis results for IS-ET during SG-DFT-MD at Au-water interfaces.

### S.4 Structures and analysis for IS-ET at Au-water-2Li interfaces

The inner-sphere CO<sub>2</sub> activation is simulated at Au-water-2Li interfaces using the SG-DFT-MD methods. Fig. S3 displays the free energy profiles and Li-O (CO<sub>2</sub>) distances for the CO<sub>2</sub> adsorption process. The Li<sup>+</sup>-O bond distances (Fig. S3b) vary between 2.4 and 4.5 Å, and are on average longer than the bond lengths of 1.98 ~ 2.63 Å for the ionic LiCO<sub>2</sub> solid.[15]

### S.5 Charge transfer and bonding analysis for CO<sub>2</sub>-K<sup>+</sup> interactions

Below we present the charge transfer and bonding analysis for the CO<sub>2</sub> molecule in water and K<sup>+</sup> electrolytes. We show the results for a representative geometry obtained from the middle of the 4ps the AIMD trajectories used in Fig. 3 to study the distance between CO<sub>2</sub> from the Au surface in pure water and the electrolyte solution. We also analyze several other geometries and the

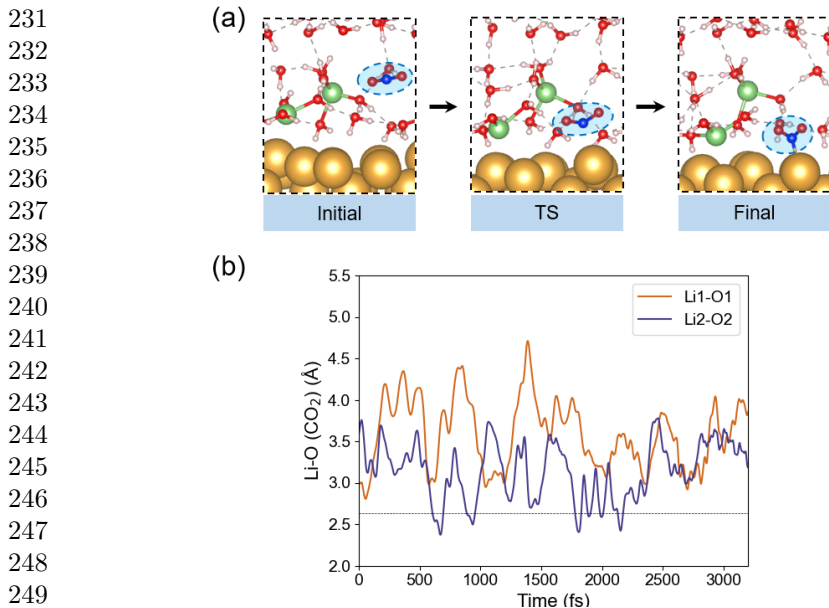

250 **Fig. S3:** Key structures (a) and Li-O ( $\text{CO}_2$ ) distance for IS-ET during SG-  
251 DFT-MD at Au-water-2Li interfaces.

252  
253 results are qualitatively and quantitatively similar. These analyses are carried out using GPAW with the setups provided in the computational methods section.

### 258 S.5.1. Bonding analysis

259 To study the interactions between  $\text{CO}_2$  and  $\text{K}^+$  we turn to the electronic localization function (ELF) which can distinguish between regions of covalent bonds, lone-pairs, metallic bonds, ionic bonds, etc. based on the electronic kinetic energy density.[16–18] In Fig. S4, we present the 2D ELF analysis on the plane connecting the  $\text{K}^+$ , O, and C in a configuration where  $\text{CO}_2$  and  $\text{K}^+$  are coordinated. The figure shows that there are no indications of covalent bonding between  $\text{CO}_2$  and K. Instead, the lone pair from the oxygen atom is directly pointed towards the cation. This strongly indicates that  $\text{CO}_2$  and  $\text{K}^+$  interaction is mediated by a short-range Coulombic interaction between the positively charged  $\text{K}^+$  ion and oxygen lone pair belonging the oxygen atom carrying a partial negative charge.

### 271 S.5.2. Charge transfer

272  
273 The charge transfer effects between  $\text{CO}_2$  and water/electrolyte environments are studied by computing the electron density difference as follows

274  
275  
276

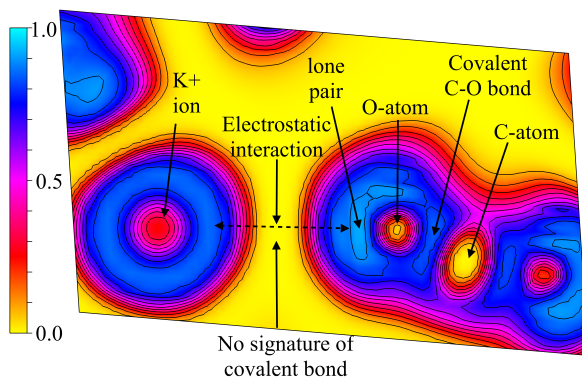

**Fig. S4:** ELF analysis of the interactions between  $\text{CO}_2$  and  $\text{K}^+$ . Different atoms and bond interactions are indicated. The color scale designates the non-dimensional ELF index where blue areas and values close to unity correspond to areas of high electron localization whereas yellow areas with values around zero denote delocalized electrons or regions of very small electron density.

$$\Delta\rho(\mathbf{r}) = \rho(\mathbf{r})_{\text{CO}_2 \text{ at interface}} - \rho(\mathbf{r})_{\text{CO}_2 \text{ in vacuum}} - \rho(\mathbf{r})_{\text{interface without CO}_2} \quad (\text{S3})$$

The results in Fig. S5 show that there is minor charge reorganization within individual molecules when  $\text{CO}_2$  is brought from the vacuum into the water or electrolyte solution. The charge transfer between different atoms is quantified by applying Bader charge partitioning on  $\Delta\rho(\mathbf{r})$  and the results are tabulated in Table S2. This analysis shows that charge transfer between different atoms and molecules in the system is negligibly small and that the minor charge reorganization can be understood as electronic polarization when  $\text{CO}_2$  is inserted in water or the  $\text{K}^+$  electrolyte.

**Table S2:** Bader charge analysis on the charge density difference. Positive values indicate electron accumulation, negative values indicate electron depletion.

| System                                              | $\text{CO}_2$ in water | $\text{CO}_2$ in $\text{K}^+$ solution |
|-----------------------------------------------------|------------------------|----------------------------------------|
| Atom                                                | $\Delta q$             | $\Delta q$                             |
| $\text{K}^+$                                        | –                      | -0.000931                              |
| O1 in $\text{CO}_2$                                 | 0.006031               | 0.001945                               |
| O2 in $\text{CO}_2$                                 | -0.002205              | -0.009412                              |
| C in $\text{CO}_2$                                  | -0.001669              | -0.004768                              |
| O atom from $\text{H}_2\text{O}$ near $\text{CO}_2$ | 0.007921               | 0.006020                               |

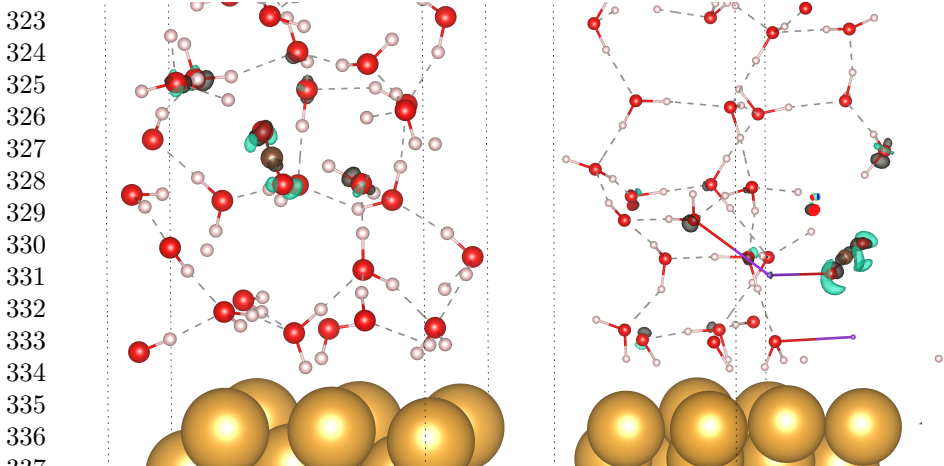

338 **Fig. S5:**  $\Delta\rho(\mathbf{r})$  plots for  $\text{CO}_2$  in water (left) and  $\text{K}^+$  solution. The black  
339 (turquoise) isosurface corresponds to regions electron accumulation (depletion)  
340 at the value  $0.0015 \text{ e}/\text{\AA}^3$ .

## 342 S.6 $\text{AM}^+-\text{CO}_2$ distance analysis during OS-ET

344 The distance analysis of  $\text{AM}^+-\text{O}$  ( $\text{CO}_2$ ) during OS-ET in cDFT-MD is per-  
345 formed in all of the simulation systems, including  $\text{CO}_2$  and  $\text{CO}_2$  anion at  
346 Au-water-2K interfaces and Au-water-2Li interfaces. For each system, 10 ps  
347 cDFT-MD is carried out, and Fig. S6 shows that there is very minor direct  
348 coordination between cations and  $\text{CO}_2$ . It should be noted that the reference  
349 values for coordination interaction, e.g.,  $2.94 \text{ \AA}$  for K-O and  $2.63 \text{ \AA}$  for Li-O,  
350 originate from the crystalline  $\text{KCO}_2$  and  $\text{LiCO}_2$ .<sup>[15]</sup>

## 352 S.7 Analysis of MD trajectories

354 Here we specify the technical details for analyzing the MD trajectories.

### 356 S.7.1. Vibrational spectra

358 The vibrational spectra are computed from velocity-velocity autocorrelation  
359 functions as<sup>[19]</sup>

$$360 \quad C_{vv}(t) = \sum_i C_{vv}^i(t) = \sum_i \langle v_i(t) \cdot v_i(t=0) \rangle \quad (\text{S4})$$

363 where  $i$  denotes atom  $i$ ,  $v_i$  is the velocity, and  $\langle X \rangle$  is the thermodynamic  
364 expectation value of  $X$  obtained by MD sampling. The vibrational frequencies  
365 are then obtained from the spectral density of  $C_{vv}(t)$  as

$$366 \quad I_{vv}(\omega) \propto \int_0^\tau dt C_{vv}^i(t) \cos(\omega t) \quad (\text{S5})$$



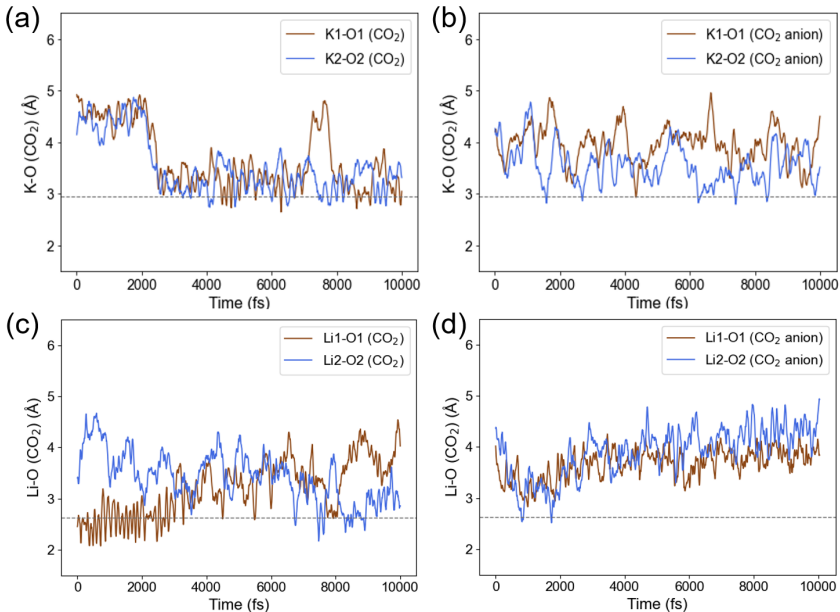

**Fig. S6:** Distance analysis during cDFT-MD at Au-water-2K interfaces including K-O (CO<sub>2</sub>) (a) and K-O (CO<sub>2</sub> anion) (b), and at Au-water-2Li interfaces including Li-O (CO<sub>2</sub>) (c) and Li-O (CO<sub>2</sub> anion) (d).

The spectral density  $I_{vv}$  contains only the vibrational peak positions and cannot be used for computing absolute (IR or Raman) intensities. As such,  $I_{vv}$  contains information about both IR and Raman active modes which is actually beneficial in the present case to enable comparing the simulations with both IR and Raman measurements.

### S.7.2. Rotational dynamics

The water rotational dynamics are computed from either the bond direction or dipole direction autocorrelation functions following Ref. 20. The direction-direction autocorrelation function  $C_{dd}$  for water molecules is

$$C_{dd}(t) = \sum_w C_{dd}^w(t) = \sum_w \langle P_l(d^w(t) \cdot d^w(0)) \rangle \quad (\text{S6})$$

where  $P_l$  is Legendre polynomial of degree  $l$ ,  $w$  denotes a single water molecule, and  $d^w$  is any vector joining any points of a water molecule – we used O-H and dipole directions. The different degrees of  $P_l$  correspond to different ranks of the rotational dynamics which in turn depend on the experimental technique used for measuring the rotational dynamics.  $l = 2$  corresponds to the relaxation of orientational correlation in Raman or magnetic resonance measurements whereas  $l = 1$  corresponds to dielectric relaxation times.<sup>[21]</sup>

415 As we are interested in electron transfer kinetics where the dynamic solvent  
 416 corrections or properties are related to dielectric relaxation times[22–24], we  
 417 have used  $l = 1$ .

418 The orientational relaxation time constant,  $\tau_{dd}$  is computed as a time  
 419 integral over the corresponding correlation function[20]

$$420 \quad 421 \quad 422 \quad \tau_{dd} = \int_0^t dt C_{dd}(t) \quad (S7)$$

423 which be used to characterize the solvent dynamics.

### 425 S.7.3. Computation of autocorrelation functions

426 Correlation functions can be computed as a convolution between quantities at  
 427 different points in time.[25] The convolution can be conveniently achieved using  
 428 fast Fourier transforms. This is particularly convenient for autocorrelation  
 429 functions as the autocorrelation in the Fourier space is just the square modulus  
 430 of the Fourier transformed time-dependent quantity of interest (here  $d^w(t)$  or  
 431  $v^i(t)$ ) and the autocorrelation is recovered after an inverse Fourier transform.  
 432 This procedure is efficiently implemented Numpy[26] in the correlate-function  
 433 which we employed in all autocorrelation function calculations.

434 For computing the vibrational spectra,  $C_{vv}(t)$  is smoothened using a  
 435 Blackman-Harris filter as implemented in Scipy.[27] To define individual water  
 436 molecules, i.e. which hydrogen and oxygen atoms are connected in different  
 437 water molecules, we used the neighborlist and connected functionalities in  
 438 ASE.[28]

439 The used scripts can be obtained from [https://gitlab.jyu.fi/mamimela/](https://gitlab.jyu.fi/mamimela/compel/-/tree/master/scripts)  
 440 [compel/-/tree/master/scripts](https://gitlab.jyu.fi/mamimela/compel/-/tree/master/scripts).

### 443 S.7.4. Orientational dynamics of water

444 The  $C_{dd}$  spectra are shown in Fig. S7 and the calculated orientational  
 445 relaxation time constants are summarized in Table S3.

446  
 447 **Table S3:** The calculated orientational relaxation time constants (fs) are sum-  
 448 marized, including the  $\text{CO}_2$  and  $\text{CO}_2^-$  in Au-water and Au-water-2K systems  
 449 with cDFT-MD trajectories.

| cDFT-MD trajectory | $\text{CO}_2$ | $\text{CO}_2^-$ |
|--------------------|---------------|-----------------|
| Au-water           | 4565          | 4439            |
| Au-water-2K        | 4719          | 4562            |

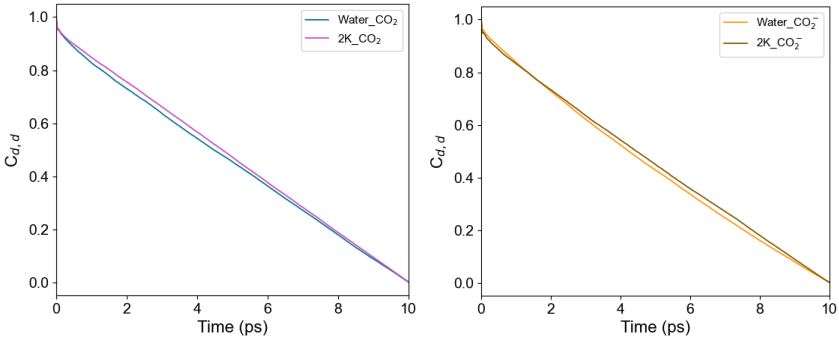

**Fig. S7:** Time dependence of orientational correlation function  $C_{dd}$  for the rotation of dipole vectors of water molecules for CO<sub>2</sub> (left) and CO<sub>2</sub><sup>-</sup> (right).

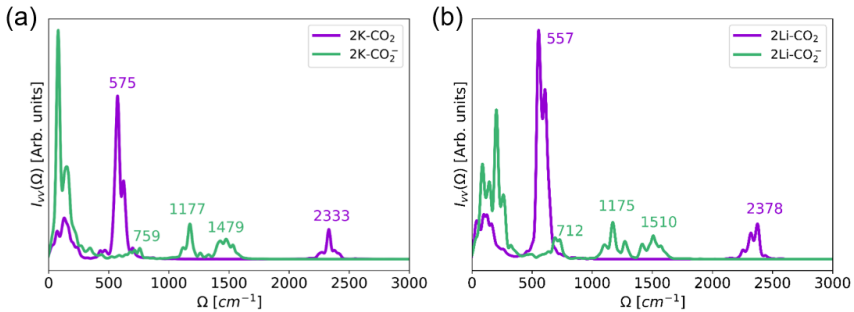

**Fig. S8:** Simulated vibration spectra of CO<sub>2</sub> and CO<sub>2</sub><sup>-</sup> during cDFT-MD for Au-water-2K (a) and Au-water-2Li (b) interfaces.

## S.8 Evaluation of electric field effect

Here, to explore the possible electric field effect, we build a large ( $4 \times 3$ ) supercell model with the same number of K<sup>+</sup> cations at Au-water interfaces, thus constructing the weaker average electric field compared to the ( $2 \times 3$ ) supercell used in previous simulations.

### S.8.1. Simulation models and parameter comparison

The ( $2 \times 3$ ) and ( $4 \times 3$ ) models are shown in Fig. S9, and lattice parameters are summarized into Table S4. For ( $2 \times 3$ ) and ( $4 \times 3$ ) models, where CO<sub>2</sub> molecules are coordinated by cations, the electric field effect can be qualitatively studied by computing and comparing the reaction barriers via SG-AIMD simulations on IS-ET CO<sub>2</sub> reductions.

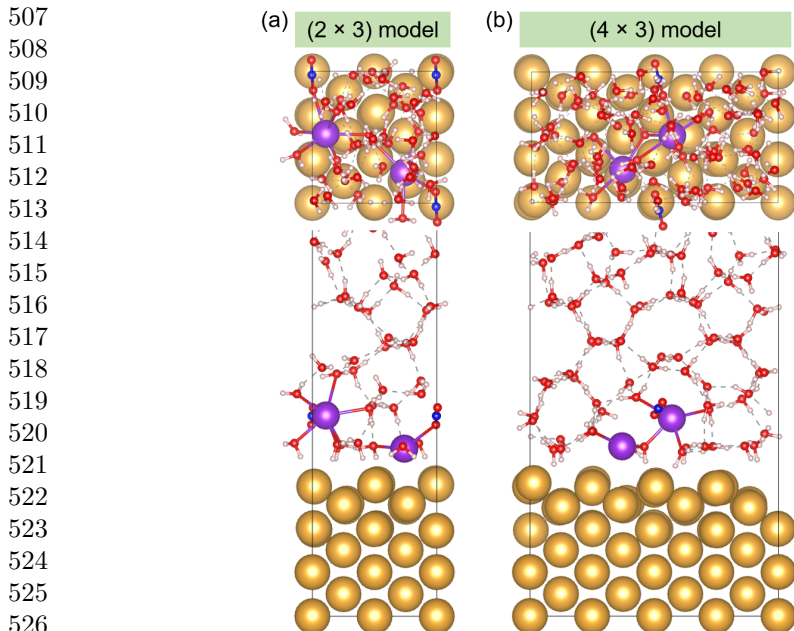

527 **Fig. S9:** Top and side view of  $(2 \times 3)$  model (a) and  $(4 \times 3)$  model (b).  
528  
529

530 **Table S4:** Parameter comparison of  $(2 \times 3)$  and  $(4 \times 3)$  simulation models.  
531

| Simulation models    | Lattice ( $\text{\AA}^3$ )    | Total atoms | Water | Cations |
|----------------------|-------------------------------|-------------|-------|---------|
| $(2 \times 3)$ model | $8.32 \times 8.82 \times 40$  | 173         | 42    | 2       |
| $(4 \times 3)$ model | $16.64 \times 8.82 \times 40$ | 350         | 87    | 2       |

532  
533  
534  
535  
536  
537 **Table S5:** The final states of  $^*\text{CO}_2^{\delta-}$  in  $(2 \times 3)$  and  $(4 \times 3)$  simulation models  
538 are compared with structure features summarized below.

| Simulation models    | C-O bond ( $\text{\AA}$ ) | O-C-O angle ( $^\circ$ ) | C-Au ( $\text{\AA}$ ) | Charge (e) |
|----------------------|---------------------------|--------------------------|-----------------------|------------|
| $(2 \times 3)$ model | 1.23&1.25                 | 130                      | 2.12                  | 0.81       |
| $(4 \times 3)$ model | 1.20&1.21                 | 155                      | 2.44                  | 0.31       |

543  
544 **S.8.2. SG-AIMD results in  $(4 \times 3)$  supercell with cation  
545 coordination**

546 For the  $(4 \times 3)$  supercell models with  $\text{CO}_2$  coordinated by cations, the reaction  
547 barrier for IS-ET is obtained via SG-AIMD simulations on the  $\text{CO}_2$  adsorp-  
548 tion as shown in Fig. S10. The final states of  $^*\text{CO}_2^{\delta-}$  in  $(2 \times 3)$  and  $(4 \times$   
549  $3)$  simulation models are compared with structure features summarized into  
550 Table S5.  
551  
552

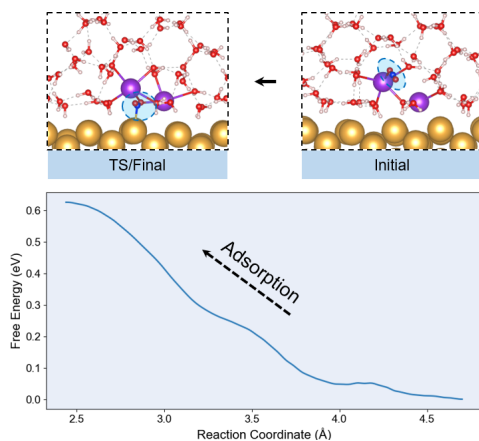

**Fig. S10:** The key structures (top) and integrated free energy profile (bottom) of CO<sub>2</sub> adsorption in the  $(4 \times 3)$  supercell model with cation coordination. The maximum evolves quite close to the ending point of the curve.

### S.8.3. SG-AIMD results in $(4 \times 3)$ supercell without cation coordination

In the  $(4 \times 3)$  supercell models, we are able to tune the positions of CO<sub>2</sub>, which could be either coordinated or non-coordinated by cations, and thus the short-range coordination effect can be differentiated from the electric field by studying the IS-ET kinetics. The basic model for cation-non-coordinated CO<sub>2</sub> in  $(4 \times 3)$  supercell is shown in Fig. S11, and the free energy profile along with key structures of SG-AIMD is shown in Fig. S12.

599  
600  
601  
602  
603  
604  
605  
606  
607  
608  
609  
610  
611  
612  
613  
614  
615  
616  
617  
618  
619  
620  
621  
622  
623  
624  
625  
626  
627  
628  
629  
630  
631  
632  
633  
634  
635  
636  
637  
638  
639  
640  
641  
642  
643  
644

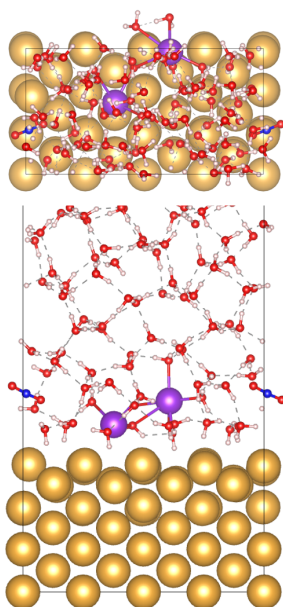

**Fig. S11:** The  $(4 \times 3)$  supercell model without cation coordination.

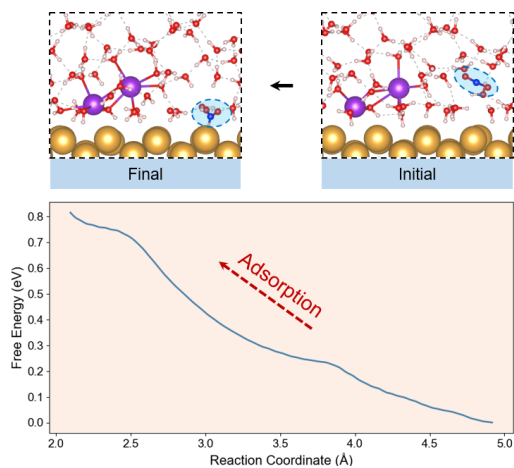

**Fig. S12:** The key structures (top) and integrated free energy profile (bottom) of  $\text{CO}_2$  adsorption in the  $(4 \times 3)$  supercell model without cation coordination.

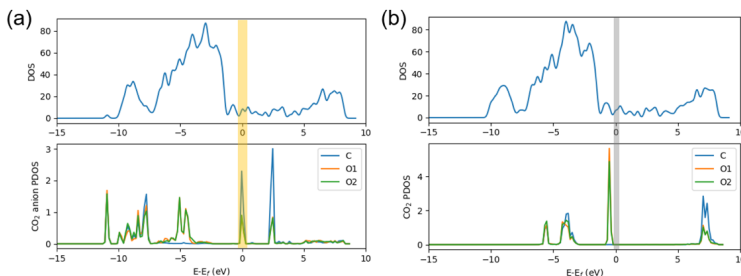

**Fig. S13:** Density of states (DOS) and projected density of states (PDOS) analysis in water- $\text{CO}_2^-$  system (a) and water- $\text{CO}_2$  system (b). Near the Fermi level ( $E-E_f = 0$  eV), the overlap between  $\text{CO}_2^-$  PDOS and total DOS is marked by yellow in a, and that between  $\text{CO}_2$  PDOS and total DOS is marked by gray in b.

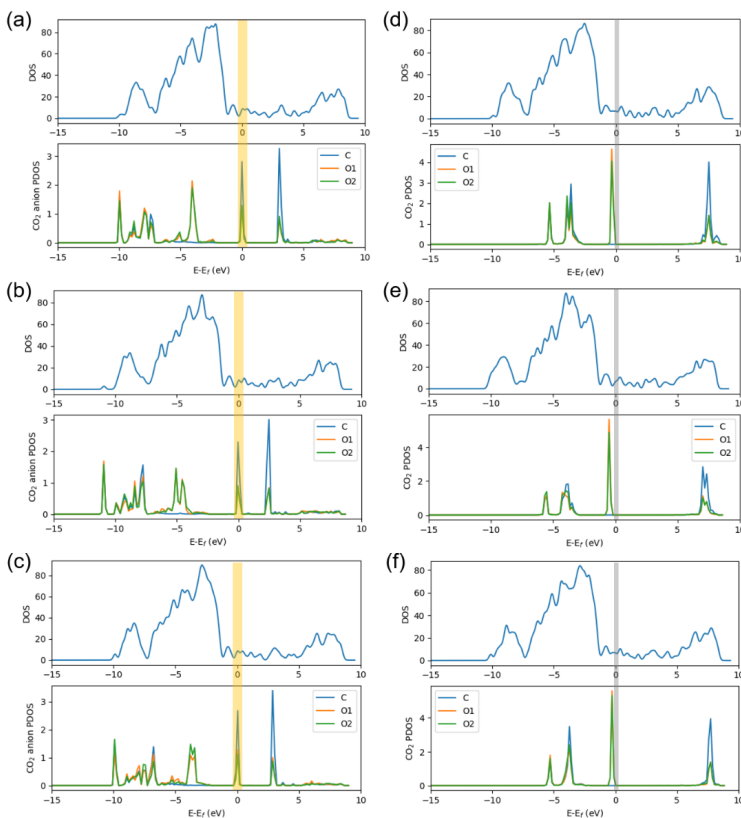

**Fig. S14:** Density of states (DOS) and projected density of states (PDOS) analysis in water- $\text{CO}_2^-$  system (a, b, and c) and water- $\text{CO}_2$  (d, e, and f) with various sampling points during OS-ET simulations.

645  
646  
647  
648  
649  
650  
651  
652  
653  
654  
655  
656  
657  
658  
659  
660  
661  
662  
663  
664  
665  
666  
667  
668  
669  
670  
671  
672  
673  
674  
675  
676  
677  
678  
679  
680  
681  
682  
683  
684  
685  
686  
687  
688  
689  
690

691 **Supplementary references**

- 692  
693 [1] Cencer, M. M. *et al.* Interactions of CO<sub>2</sub> anion radicals with electrolyte  
694 environments from first-principles simulations. *ACS Omega* **7**, 18131–  
695 18138 (2022) .
- 696  
697 [2] Chan, K. & Nørskov, J. K. Electrochemical barriers made simple. *J.*  
698 *Phys. Chem. Lett.* **6**, 2663–2668 (2015) .
- 699  
700 [3] Melander, M., Wu, T. & Honkala, K. Constant inner potential DFT  
701 for modelling electrochemical systems under constant potential and bias  
702 (2023) .
- 703  
704 [4] Zhou, H. & Szabo, A. Microscopic formulation of Marcus’ theory of  
705 electron transfer. *J. Chem. Phys.* **103**, 3481–3494 (1995) .
- 706  
707 [5] Georgievskii, Y., Hsu, C.-P. & Marcus, R. A. Linear response in theory  
708 of electron transfer reactions as an alternative to the molecular harmonic  
709 oscillator model. *J. Chem. Phys.* **110**, 5307–5317 (1999) .
- 710  
711 [6] Vuilleumier, R., Tay, K. A., Jeanmairet, G., Borgis, D. & Boutin, A.  
712 Extension of marcus picture for electron transfer reactions with large  
713 solvation changes. *J. Am. Chem. Soc.* **134**, 2067–2074 (2012) .
- 714  
715 [7] Kaduk, B., Kowalczyk, T. & Van Voorhis, T. Constrained density  
716 functional theory. *Chem. Rev.* **112**, 321–370 (2012) .
- 717  
718 [8] Melander, M., Jónsson, E. Ö., Mortensen, J. J., Vegge, T. & García Las-  
719 tra, J. M. Implementation of constrained DFT for computing charge  
720 transfer rates within the projector augmented wave method. *J. Chem.*  
*Theory Comput.* **12**, 5367–5378 (2016) .
- 721  
722 [9] Woo, T. K., Margl, P. M., Blöchl, P. E. & Ziegler, T. A combined  
723 Car-Parrinello QM/MM implementation for ab initio molecular dynamics  
724 simulations of extended systems: Application to transition metal catalysis.  
725 *J. Phys. Chem. B* **101**, 7877–7880 (1997) .
- 726  
727 [10] Jarzynski, C. Nonequilibrium equality for free energy differences. *Phys.*  
728 *Rev. Lett.* **78**, 2690–2693 (1997) .
- 729  
730 [11] Sprik, M. & Ciccotti, G. Free energy from constrained molecular  
731 dynamics. *J. Chem. Phys.* **109**, 7737–7744 (1998) .
- 732  
733 [12] Hassanali, A. A., Cuny, J., Verdolino, V. & Parrinello, M. Aqueous solu-  
734 tions: state of the art in *ab initio* molecular dynamics. *Phil. Trans. R.*  
*Soc. A.* **372**, 20120482 (2014) .
- 735  
736



- [13] Henkelman, G., Arnaldsson, A. & Jónsson, H. A fast and robust algorithm for bader decomposition of charge density. *Comput. Mater. Sci.* **36**, 354–360 (2006) .
- [14] Yu, M. & Trinkle, D. R. Accurate and efficient algorithm for bader charge integration. *J. Chem. Phys.* **134**, 064111 (2011) .
- [15] Jain, A. *et al.* Commentary: The materials project: A materials genome approach to accelerating materials innovation. *APL Mater.* **1**, 011002 (2013) .
- [16] Becke, A. D. & Edgecombe, K. E. A simple measure of electron localization in atomic and molecular systems. *J. Chem. Phys.* **92**, 5397–5403 (1990) .
- [17] Savin, A., Nesper, R., Wengert, S. & Fässler, T. F. Elf: The electron localization function. *Angew. Chem. Int. Ed.* **36**, 1808–1832 (1997) .
- [18] Koumpouras, K. & Larsson, J. A. Distinguishing between chemical bonding and physical binding using electron localization function (ELF). *J. Phys.: Condens. Matter* **32** (31), 315502 (2020) .
- [19] Praprotnik, M. & Janežič, D. Molecular dynamics integration and molecular vibrational theory. ii. simulation of nonlinear molecules. *J. Chem. Phys.* **122**, 174102 (2005) .
- [20] Bankura, A., Karmakar, A., Carnevale, V., Chandra, A. & Klein, M. L. Structure, dynamics, and spectral diffusion of water from first-principles molecular dynamics. *J. Phys. Chem. C* **118**, 29401–29411 (2014) .
- [21] Banerjee, P. & Bagchi, B. Rotational dynamics of polyatomic ions in aqueous solutions: From continuum model to mode-coupling theory, aided by computer simulations. *J. Chem. Phys.* **148**, 224504 (2018) .
- [22] Zusman, L. Outer-sphere electron transfer in polar solvents. *Chem. Phys.* **49**, 295–304 (1980) .
- [23] Calef, D. F. & Wolynes, P. G. Classical solvent dynamics and electron transfer. 1. continuum theory. *J. Phys. Chem.* **87**, 3387–3400 (1983) .
- [24] He, Z.-D., Chen, Y.-X., Santos, E. & Schmickler, W. The pre-exponential factor in electrochemistry. *Angew. Chem. Int. Ed.* **57**, 7948–7956 (2018) .
- [25] Allen, M. P. & Tildesley, D. J. *Computer Simulation of Liquids* (Oxford University Press, New York, 1987).
- [26] Harris, C. R. *et al.* Array programming with NumPy. *Nat.* **585**, 357–362 (2020) .

783 [27] Virtanen, P. *et al.* SciPy 1.0: Fundamental Algorithms for Scientific  
784 Computing in Python. *Nat. Methods* **17**, 261–272 (2020) .

785  
786 [28] Larsen, A. H. *et al.* The atomic simulation environment—a Python library  
787 for working with atoms. *J. Phys.: Condens. Matter* **29** (27), 273002 (2017)

788 .  
789  
790  
791  
792  
793  
794  
795  
796  
797  
798  
799  
800  
801  
802  
803  
804  
805  
806  
807  
808  
809  
810  
811  
812  
813  
814  
815  
816  
817  
818  
819  
820  
821  
822  
823  
824  
825  
826  
827  
828
